# Supplementary material
Source: Springer Nature journal article supplement (https://www.springermedizin.de/resource/supplementary/12913_2013_3099_MOESM2_ESM.pdf/9532412)
Supplement: MOESM2 [file 9532412]

## Views of young people from integrated facilities

### Health provider concerns

- Advice may be scary and discouraging
- Poor provider approach and being judgemental
- Limited Knowledge of HSP
- language barrier
- Prefer same gender provider (boys)
- Age of provider
- Favouritism to clients known to them

### Service delivery related concerns

- Uncomfortable health seeking environment
- Long waiting time
- YFS service unavailability
- Lack of proper directions
- Games – may be made into a base for some boys
- Lack of appropriate or effective drugs

### Young people related concerns

- Fears – knowing HIV status, being seen going to facility/VCT or YC
- Assumptions: Assumes that partner is HIV negative
- Lack of openness and honesty among youths
- Lack of awareness of available services
- Societal expectations and responsibilities
  - Parental restriction on girls
  - Girls having a lot of housework

## Views of young people from youth centres

### Health provider concerns

- Lack of full-time clinician - Part-time hrs are inconvenient (NYC)
- Young people may not get along with staff working at YC

### Service delivery concerns

- Service unavailability- lack of full-time clinician - part-time hrs are inconvenient (Nairobi YC)
- Absence of proper direction
- Games - May only attract boys: make girls shy away: may be a hindrance if not well located

### Young people's concerns

- Fears - embarrassment, knowing HIV status
- Lack of anonymity - being seen going to the health facility; facility location
- Lack of awareness of available services
- Negative peer influence: preferring advice from peers: being discouraged by peers with negative experience: 'know it all' attitude
- Lack of time to visit youth centre. Young people are students or working
- Lack of transport and distance of service from community
